# Supplementary material
Source: publisher site journal article supplement (https://www.dovepress.com/article/442054)
Supplement: Supplementary file 1 [file get_supplementary_file.php]

## Supplementary materials

**
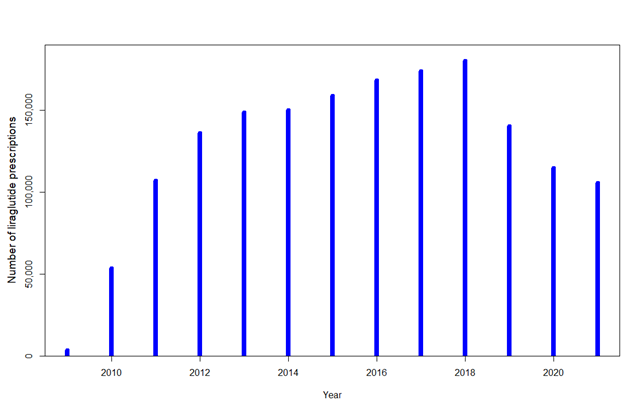
**

**Figure S1.** Number of prescriptions with liraglutide per year during the study period. Prescriptions are not unique per individual.

**Table S1**. Number of individuals with the SeHCAT test followed by a prescription with colestyramine, colestipol, or colesevelam within different time periods after the SeHCAT test

| **Time period** | **n** |
| --- | --- |
| SeHCAT test + prescription within 1 month | 2,694 |
| SeHCAT test + prescription within 3 months | 4,515 |
| SeHCAT test + prescription within 6 months | 4,981 |
| SeHCAT test + prescription within 1 year | 5,230 |
| SeHCAT test + prescription with no time constraint | 6,379 |

*SeHCAT, ⁷⁵selenium-homotaurocholic acid*

**Table S2**. Liraglutide (ATC code: A10BJ02) prescriptions among individuals suffering from BAD (individuals diagnosed with ICD10 code K90.8B or a SeHCAT test followed by a prescription of bile acid sequestrant within 365 days). Individuals suffering from BAD may have bile acid sequestrant prescriptions before liraglutide prescription.

|  | **n** |
| --- | --- |
| Individuals suffering from BAD with prescriptions of liraglutide both before and after the SeHCAT test, no time limit | 190 |
| Individuals suffering from BAD with a prescription of liraglutide after the SeHCAT test, with no prior prescription of liraglutide | 248 |
| Liraglutide prescriptions after SeHCAT test and after prescription with bile acid sequestrants, with no prescription of liraglutide before SeHCAT in non-unique individuals with BAD | 226 |
| Liraglutide prescriptions after SeHCAT test and after prescription with colestyramine, with no prescription of liraglutide before SeHCAT in individuals with BAD | 161 |
| Liraglutide prescriptions after the SeHCAT test and after prescription with colesevelam, with no prescription of liraglutide before SeHCAT in individuals with BAD | 58 |
| Liraglutide prescriptions after SeHCAT test and after prescription with colestipol, with no prescription of liraglutide before SeHCAT in individuals with BAD | 7 |

*ICD10, International Classification of Diseases Version 10; SeHCAT, ⁷⁵selenium-homotaurocholic acid*
